# Supplementary material
Source: PubMed Central journal article supplement (PMC7179765)
Supplement: NIHMS1580460-supplement-Supplementary_figures_1-8.pdf [file NIHMS1580460-supplement-Supplementary_figures_1-8.pdf]

pedigrees. Upper panel, Mht plot showing the  $P$  values of association between the elevated B:T ratio and mutations identified in the 17 pedigrees, calculated using a recessive model of inheritance. **f**, Lower panel, MCMV titer in the spleen of mice from 5 of the 17 pedigrees five days after infection with MCMV. Upper panel, Mht plot showing the  $P$  values of association between elevated MCMV titer and mutations identified in the 5 pedigrees, calculated using a recessive model of inheritance. For scatter plots: C57BL/6J, REF ( $Snrnp40^{+/+}$ ), HET ( $Snrnp40^{swp/+}$ ), and VAR ( $Snrnp40^{swp/swp}$ ). Each data point represents one mouse. Mean ( $\mu$ ) and SD ( $\sigma$ ) are indicated. For Mht plots: The  $-\text{Log}_{10} P$  values (Y axis) were plotted versus the chromosomal positions of mutations (X axis). Horizontal red and purple lines represent thresholds of  $P = 0.05$  with or without Bonferroni correction, respectively.  $n=168$  REF,  $n=212$  HET,  $n=29$  VAR in **a-e**;  $n=56$  REF,  $n=55$  HET,  $n=8$  VAR in **f**. Ten to twenty C57BL/6J wild-type mice (total  $n$  in scatter plots not counted) were included as controls in each screening experiment but were not used for  $P$  value calculation (**a-f**). All  $P$  values in upper panels (**a-f**) were calculated using generalized linear model.  $P=3.274\text{e-}24$  in **a** (raw data, wG2, recessive model),  $P=8.547\text{e-}19$  in **b** (raw data, wG2, recessive model),  $P=1.044\text{e-}26$  in **c** (raw data, wG2, recessive model),  $P=0.045939$  in **d** (raw data, wG2, recessive model),  $P=3.22\text{e-}29$  in **e** (normalized data, wG2, recessive model),  $P=1.614\text{e-}19$  in **f** (log data, wG2, recessive model).



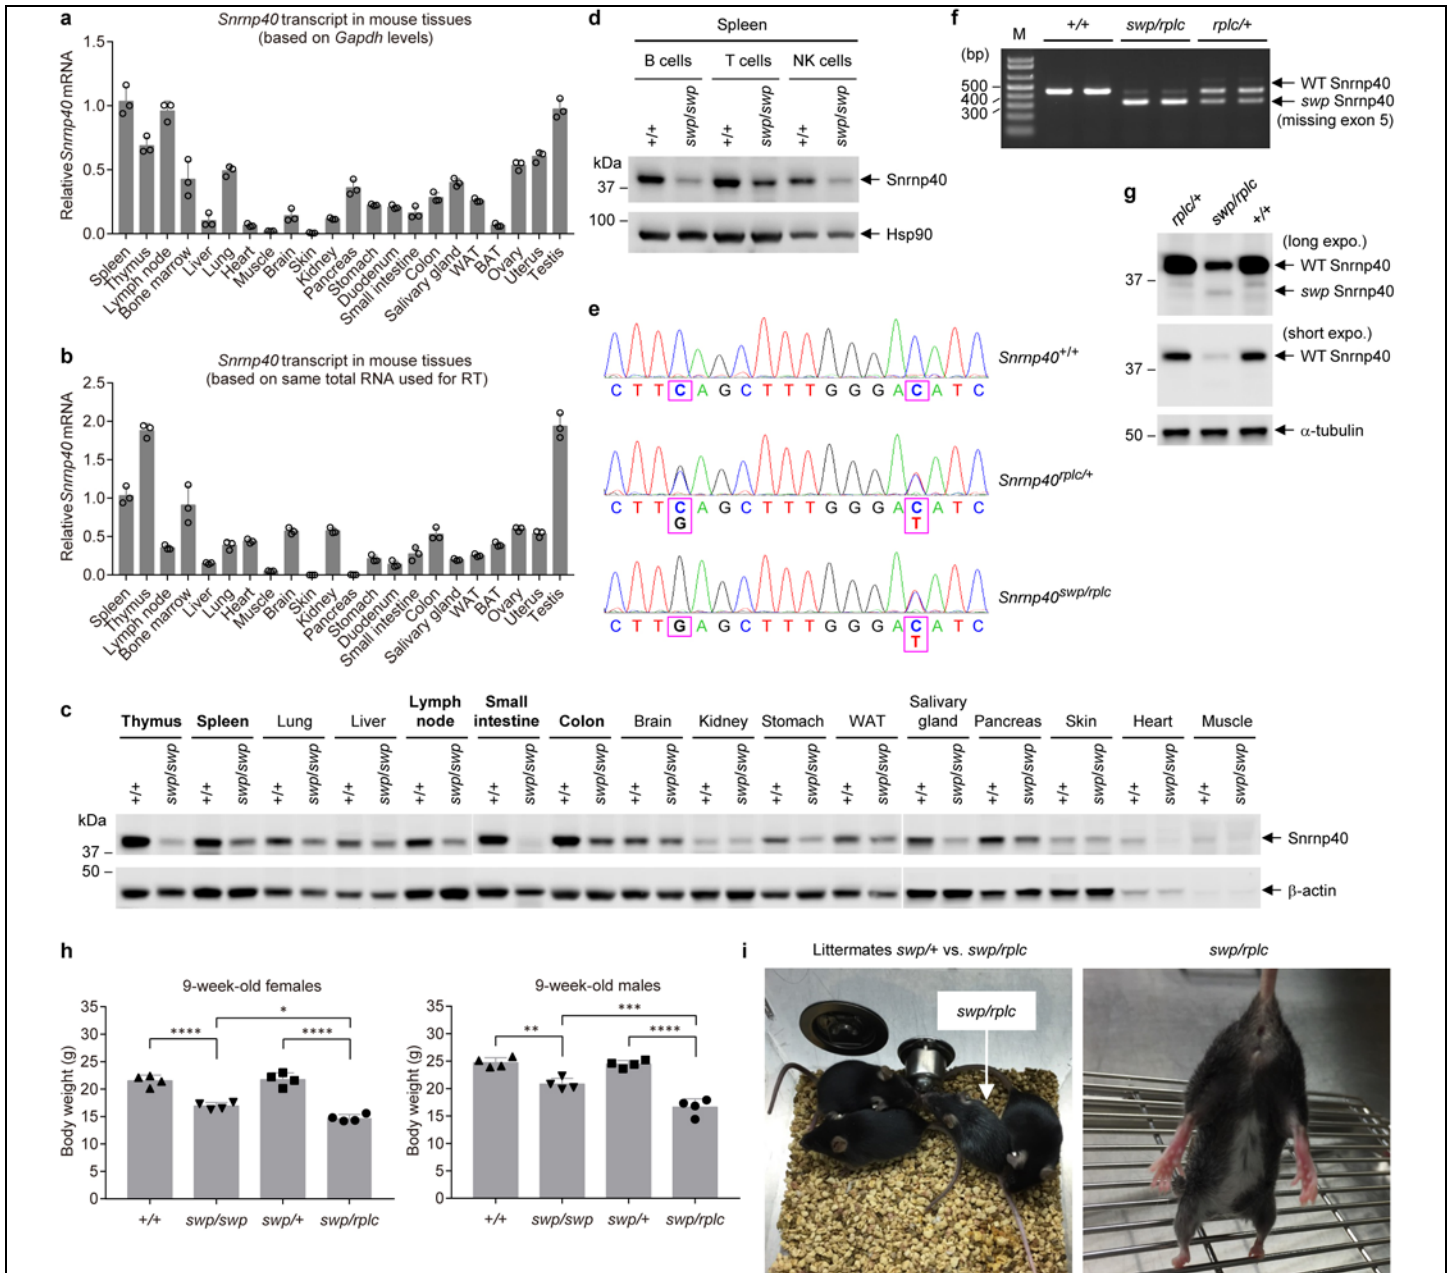

**Supplementary Figure 3**

***Snrnp40* expression profile and the *Snrnp40*<sup>plc</sup> allele.**

**a,b**, RT-qPCR analysis of *Snrnp40* mRNA levels in various mouse tissues normalized by *Gapdh* mRNA levels using  $2^{-\Delta\Delta Ct}$  method (**a**), or by total RNA levels used for reverse transcription using  $2^{-\Delta Ct}$  method (**b**).  $n=3$  wild-type C57BL/6J littermate mice in **a,b**. **c**, Immunoblot analysis of Snrnp40 in various mouse tissues. **d**, Immunoblot analysis of Snrnp40 in splenic B cells, T cells, and NK cells. **e**, DNA sequencing chromatograms. The region containing the *swp* mutation (C→G) and the marker mutation (C→T) in *Snrnp40*<sup>+/+</sup>, *Snrnp40*<sup>rplc/+</sup>, and *Snrnp40*<sup>swp/rplc</sup> mice is shown. **f**, RT-PCR amplification across exon 5 of *Snrnp40* mRNA from splenocytes of *Snrnp40*<sup>+/+</sup>, *Snrnp40*<sup>rplc/+</sup>, and *Snrnp40*<sup>swp/rplc</sup> mice. **g**, Immunoblot analysis of Snrnp40 in splenocytes of the indicated genotypes. Data are representative of five independent experiments with similar results. **h**, Body weight of female and male mice at 9 weeks of age ( $n=4$  for each genotype).  $P$  values were determined by one-way ANOVA with Sidak's multiple comparisons test. \* $P=0.031$ , \*\* $P=0.0015$ , \*\*\* $P=0.0009$ , \*\*\*\* $P<0.0001$ . **i**, Representative images of *Snrnp40*<sup>swp/rplc</sup> mice and *Snrnp40*<sup>swp/+</sup> littermates. *Snrnp40*<sup>swp/rplc</sup> mice display reduced body size, some white back hairs, and a patch of white hair on the belly. Data are representative of two (**a-c**), three (**d,f,h**), or five (**g**) independent experiments (mean  $\pm$  s.d. in **a,b,h**).

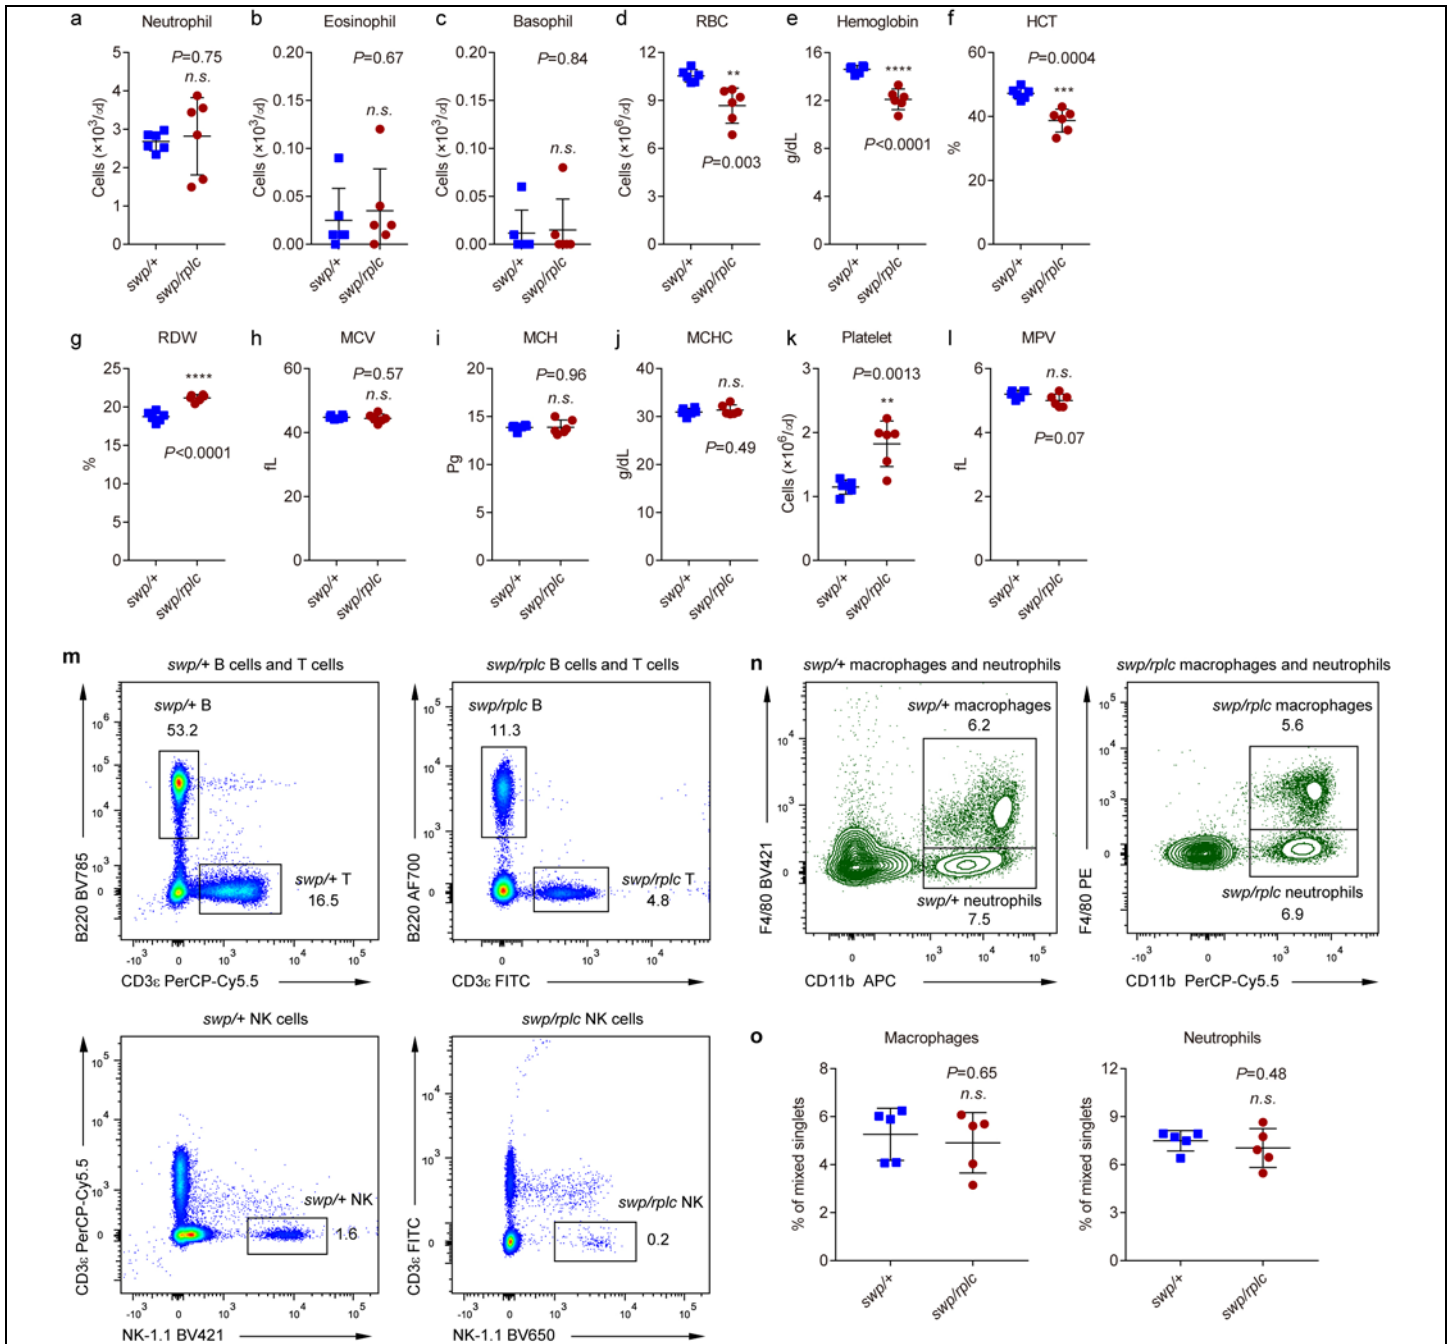

#### Supplementary Figure 4

#### Analysis of immune cells in the blood of *Snrnp40*<sup>swp/rplc</sup> mice.

**a-l**, Hematological analysis of blood from *Snrnp40*<sup>swp/rplc</sup> and *Snrnp40*<sup>swp/+</sup> littermates ( $n=6$  mice for each genotype). Neutrophil (**a**), eosinophil (**b**), basophil (**c**), red blood cells (RBC) (**d**), hemoglobin (**e**), hematocrit (HCT) (**f**), red cell distribution width (RDW) (**g**), mean cell volume (MCV) (**h**), mean cell hemoglobin (MCH) (**i**), mean corpuscular hemoglobin concentration (MCHC) (**j**), platelet (**k**), and mean platelet volume (MPV) (**l**) were determined. The indicated  $P$  values were determined by unpaired, two-tailed Student's  $t$ -test. **m,n**, Flow cytometry of cells in samples containing equal volumes of blood isolated from *Snrnp40*<sup>swp/rplc</sup> and *Snrnp40*<sup>swp/+</sup> mice, assessing the absolute number ratio of B cells (B220<sup>+</sup>), T cells (CD3 $\epsilon$ <sup>+</sup>), and NK cells (NK1.1<sup>+</sup>CD3 $\epsilon$ <sup>-</sup>) (**m**), or macrophages (CD11b<sup>+</sup>F4/80<sup>+</sup>) and neutrophils (CD11b<sup>+</sup>F4/80<sup>-</sup>) (**n**) in *Snrnp40*<sup>swp/rplc</sup> and *Snrnp40*<sup>swp/+</sup> littermates. Numbers indicate percent cells in outlined areas. **o**, Frequency of macrophages and neutrophils in the mixed blood samples. n.s., not significant ( $P$  values indicated; unpaired, two-tailed Student's  $t$ -test). Data are representative of two (**n,o**), three (**m**), or four (**a-l**) independent experiments (mean  $\pm$  s.d. in **a-l,o**).

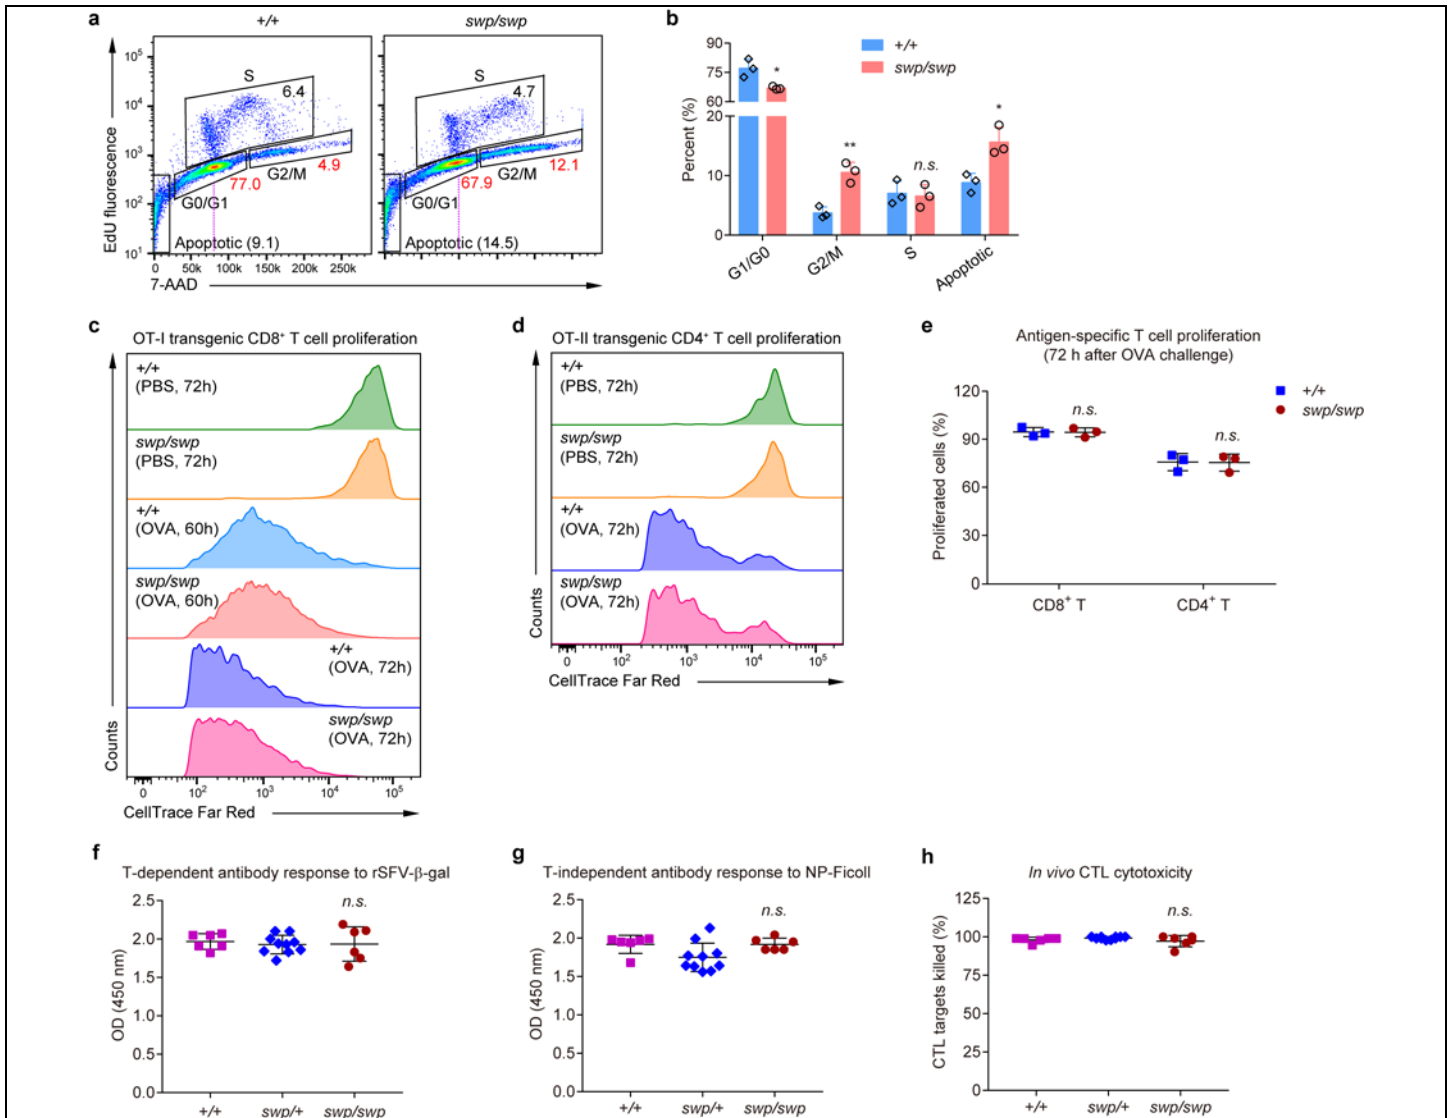

**Supplementary Figure 5**

**Defective cell cycle progression of *Snrnp40*<sup>swp/swp</sup> T cells and normal adaptive immune responses in *Snrnp40*<sup>swp/swp</sup> mice.**

**a**, Mitotic cell cycle analysis. Flow cytometry of splenic T cells activated by TCR stimulation for three days and then labeled with EdU for 6 h, assessed for EdU incorporation and 7-AAD staining. Dotted line denotes the average size of T cells at G0/G1 stage. Numbers indicate percent cells in outlined areas. **b**, Quantification of the percentage of T cells in the indicated stage of the cell cycle, or the percentage of apoptotic cells determined as in (a). *n.s.*, not significant ( $P=0.80$ ), \* $P=0.021$ , \*\* $P=0.0039$ , \* $P=0.016$  (unpaired, two-tailed Student's *t*-test). **c**, Wild-type recipient mice (C57BL/6J, CD45.1) adoptively transferred with CellTrace<sup>TM</sup> Far Red-labeled *Snrnp40*<sup>swp/swp</sup> or wild-type OT-I CD8<sup>+</sup> T cells (CD45.2). Flow cytometry of CellTrace<sup>TM</sup> Far Red dilution in *Snrnp40*<sup>swp/swp</sup> or wild-type OT-I CD8<sup>+</sup> T cells isolated from the spleens of recipient mice 60 or 72 h after immunization with OVA or PBS. **d**, Wild-type recipient mice (C57BL/6J, CD45.1) adoptively transferred with CellTrace Far<sup>TM</sup> Red-labeled *Snrnp40*<sup>swp/swp</sup> or wild-type OT-II CD4<sup>+</sup> T cells (CD45.2). Flow cytometry of CellTrace<sup>TM</sup> Far Red dilution in *Snrnp40*<sup>swp/swp</sup> or wild-type OT-II CD4<sup>+</sup> T cells isolated from the spleens of recipient mice 72 h after immunization with OVA or PBS. **e**, Quantification of the percentage of OT-I (CD8<sup>+</sup>) and OT-II (CD4<sup>+</sup>) cells that underwent proliferation in response to OVA immunization measured 72 h after immunization ( $n=4$  mice per genotype; *n.s.*, not significant ( $P=0.94$ , 0.95); unpaired, two-tailed Student's *t*-test). **f,g**, Antibody responses to immunization. T-dependent antibody response to rSFV-β-gal (**f**) and T-independent antibody response to NP-Ficoll (**g**) in *Snrnp40*<sup>+/+</sup> ( $n=6$ ), *Snrnp40*<sup>swp/+</sup> ( $n=10$ ), and *Snrnp40*<sup>swp/swp</sup> ( $n=6$ ) mice were measured 13 days and 6 days after immunization, respectively. *n.s.*, not significant ( $P=0.87$  in **f**,  $P=0.05$  in **g**); one-way ANOVA with Sidak's multiple comparisons. **h**, *In vivo* CTL cytotoxicity in *Snrnp40*<sup>+/+</sup> ( $n=6$ ), *Snrnp40*<sup>swp/+</sup> ( $n=10$ ), and *Snrnp40*<sup>swp/swp</sup> ( $n=6$ ) mice. *n.s.*, not significant ( $P=0.19$ ); one-way ANOVA with Sidak's multiple comparisons. Data are representative of two (**f-h**) and three (**a-e**) independent experiments (mean ± s.d. in **b,e,f-h**).

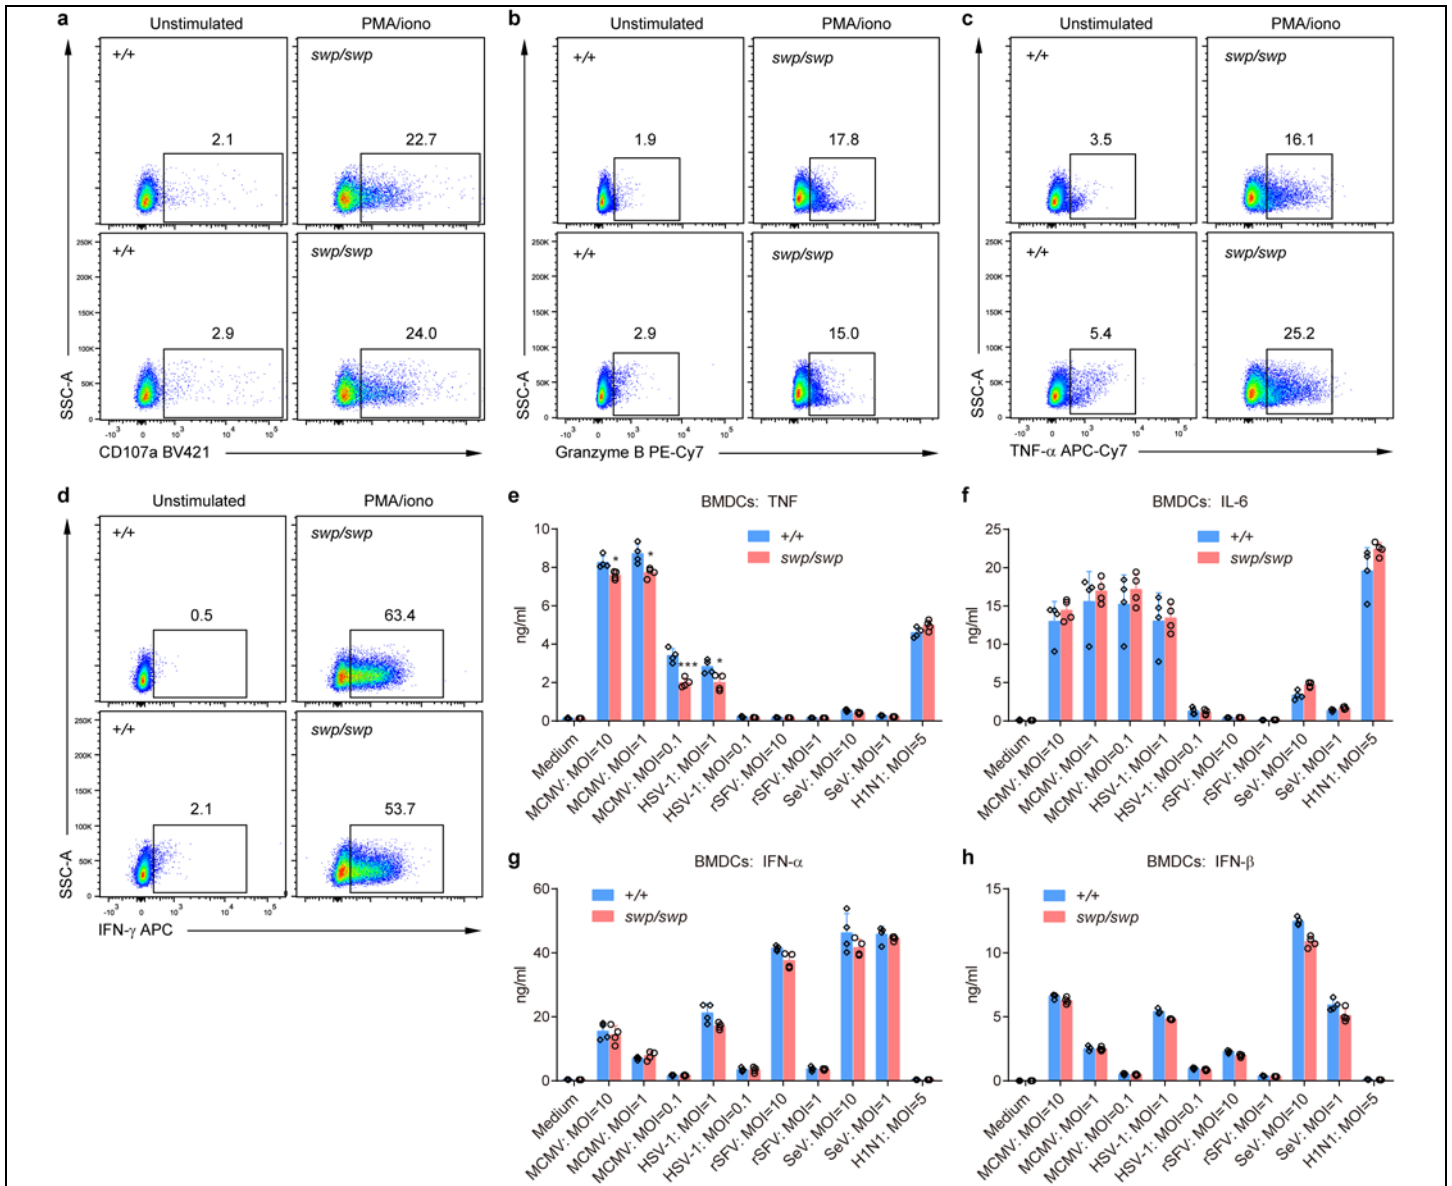

**Supplementary Figure 6**

**Normal *Snrnp40*<sup>swp/swp</sup> NK cell degranulation and BMDc cytokine production.**

**a-d**, Flow cytometry of NK cells from the spleens of *Snrnp40*<sup>swp/swp</sup> and wild-type mice assessing the expression of Lamp-1 (CD107a) (**a**), granzyme B (**b**), TNF (**c**), and IFN-γ (**d**) in response to stimulation with PMA/ionomycin (50 ng/ml PMA and 1 μg/ml ionomycin) or no stimulation. **e-h**, Concentration of TNF (**e**), IL-6 (**f**), IFN-α (**g**), and IFN-β (**h**) in the supernatants of *Snrnp40*<sup>swp/swp</sup> and wild-type BMDCs 16 hours after infection with the indicated viruses and multiplicities of infection (MOI) ( $n=4$  independent BMDCs, each generated from independent mice; \* $P=0.015$ , 0.014, 0.022, \*\*\* $P=0.00066$ , unpaired, two-tailed Student's *t*-test). Data are representative of three independent experiments (**a-h**; mean ± s.d. in **e-h**).

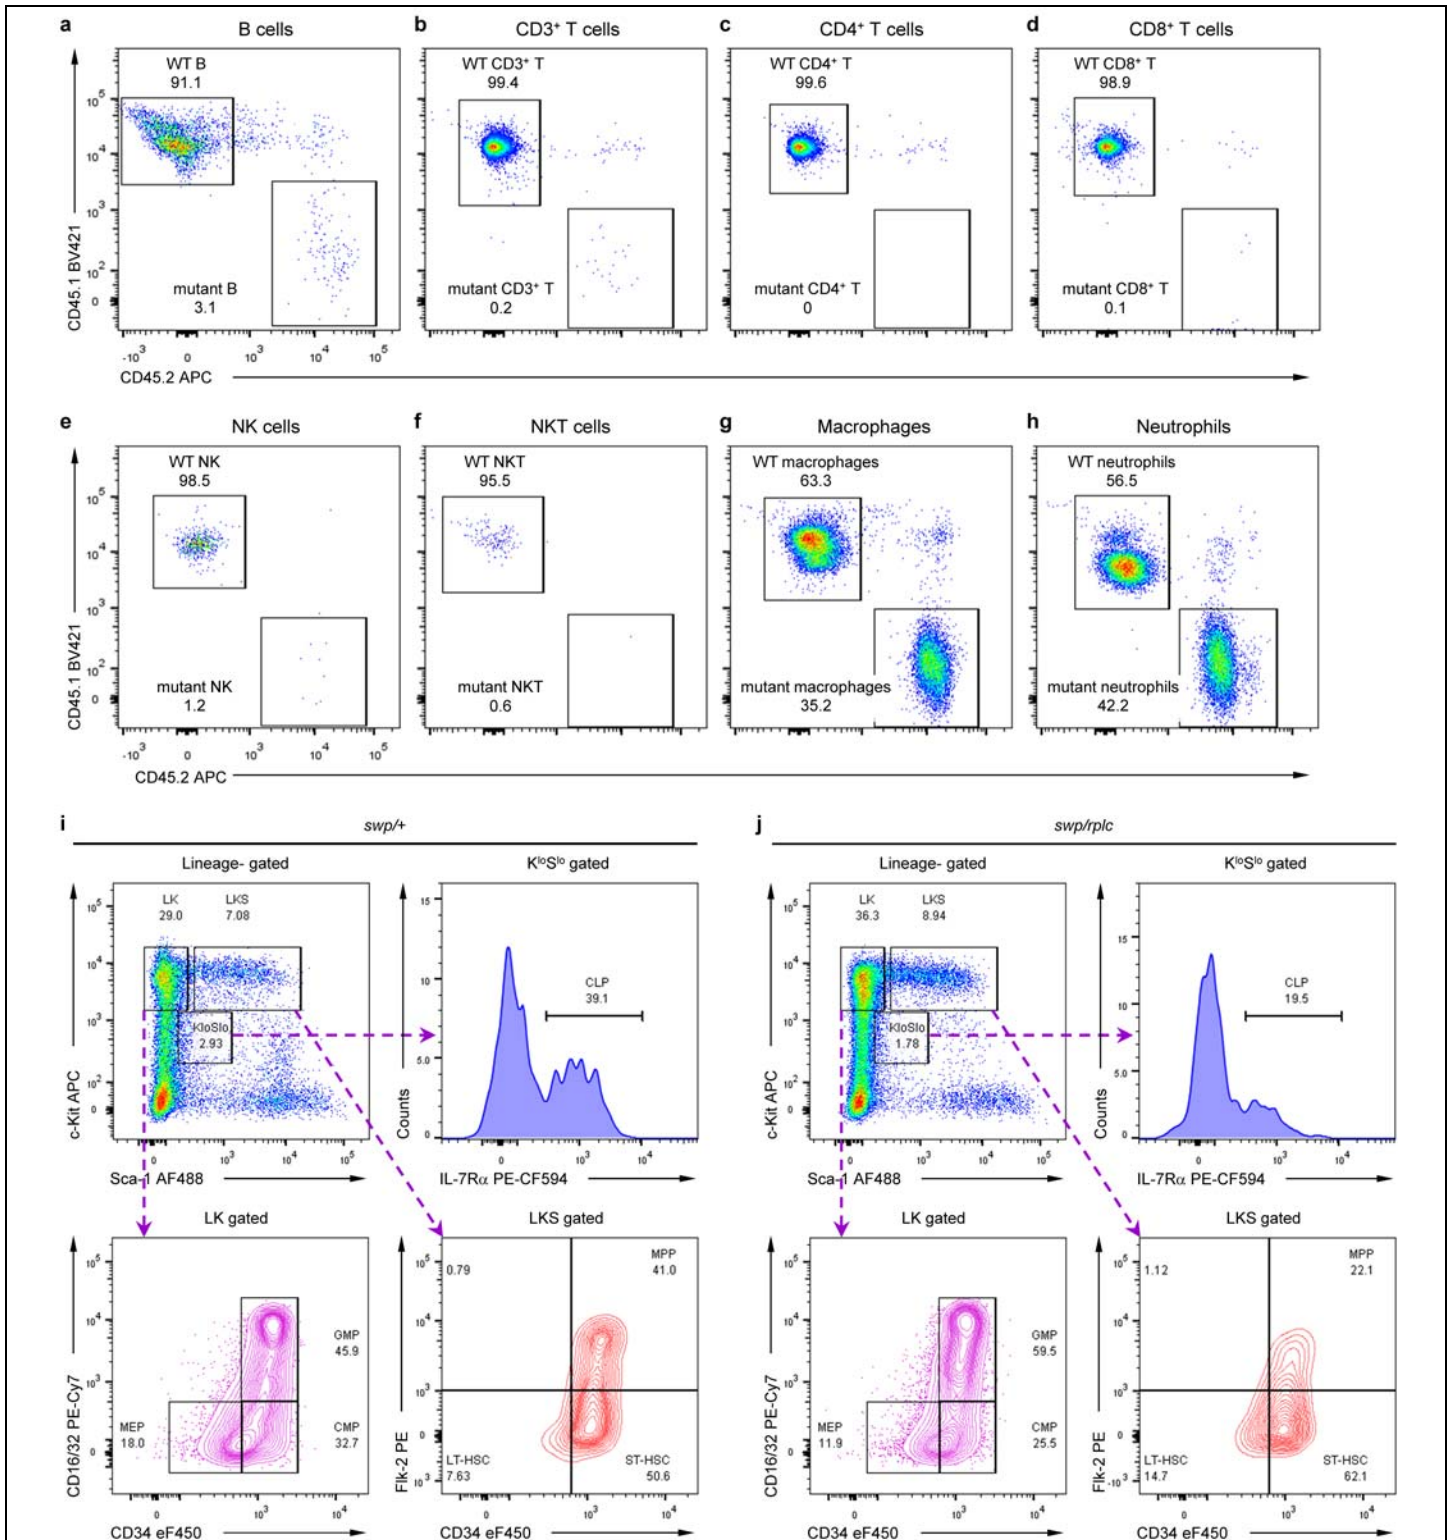

**Supplementary Figure 7**

**Hematopoietic cell-intrinsic defect in lymphoid development in *Snrnp40*<sup>swp/rplc</sup> mutant mice.**

**a-h**, Flow cytometry of immune cells in the blood of mixed bone marrow chimeras reconstituted with a 1:1 mixture of wild-type (CD45.1) and *Snrnp40*<sup>swp/rplc</sup> (CD45.2) bone marrow cells, assessing the percentage of B cells (**a**, B220<sup>+</sup>), CD3<sup>+</sup> T cells (**b**, CD3e<sup>+</sup>), CD4<sup>+</sup> T cells



(**c**, CD3 $\epsilon$ <sup>+</sup>CD4<sup>+</sup>), CD8<sup>+</sup> T cells (**d**, CD3 $\epsilon$ <sup>+</sup>CD8 $\alpha$ <sup>+</sup>), NK cells (**e**, NK-1.1<sup>+</sup>CD3 $\epsilon$ <sup>-</sup>), NKT cells (**f**, NK-1.1<sup>+</sup>CD3 $\epsilon$ <sup>+</sup>), macrophages (**g**, CD11b<sup>+</sup>F4/80<sup>+</sup>), and neutrophils (**h**, CD11b<sup>+</sup>F4/80<sup>-</sup>) derived from wild-type (CD45.1) and *Snrnp40*<sup>swp/rplc</sup> (CD45.2) bone marrows respectively. Representative results from one of ten chimeras in two experiments are shown (**a-h**). **i-j**, Gating strategy for flow cytometry analysis of hematopoietic stem and progenitor cells in *Snrnp40*<sup>swp/+</sup> (**i**) and *Snrnp40*<sup>swp/rplc</sup> (**j**) bone marrow. Single cells negative for Lineage expression (Lineage<sup>-</sup>) were further classified into three populations based on c-Kit and Sca-1 expression: LKS (c-Kit<sup>+</sup>Sca-1<sup>+</sup>), LK (c-Kit<sup>+</sup>Sca-1<sup>-</sup>), and K<sup>lo</sup>S<sup>lo</sup> (c-Kit<sup>lo</sup>Sca-1<sup>lo</sup>). The LKS population was classified into three populations based on Flk-2 and CD34 expression: long-term hematopoietic stem cells (LT-HSC, CD34<sup>-</sup>Flk-2<sup>-</sup>), short-term hematopoietic stem cells (ST-HSC, CD34<sup>+</sup>Flk-2<sup>-</sup>), and multipotent progenitor cells (MPPs, CD34<sup>+</sup>Flk-2<sup>+</sup>). The LK population was classified into three populations based on CD16/32 and CD34 expression: megakaryocyte–erythroid progenitors (MEPs, CD34<sup>-</sup>CD16/32<sup>-</sup>), common myeloid progenitors (CMPs, CD34<sup>+</sup>CD16/32<sup>-</sup>), and granulocyte-macrophage progenitors (GMPs, CD34<sup>+</sup>CD16/32<sup>+</sup>). The K<sup>lo</sup>S<sup>lo</sup> population expressing IL-7R $\alpha$  was defined as common lymphoid progenitors (CLPs, IL-7R $\alpha$ <sup>+</sup>). Representative results from one of three independent experiments are shown (**i,j**).

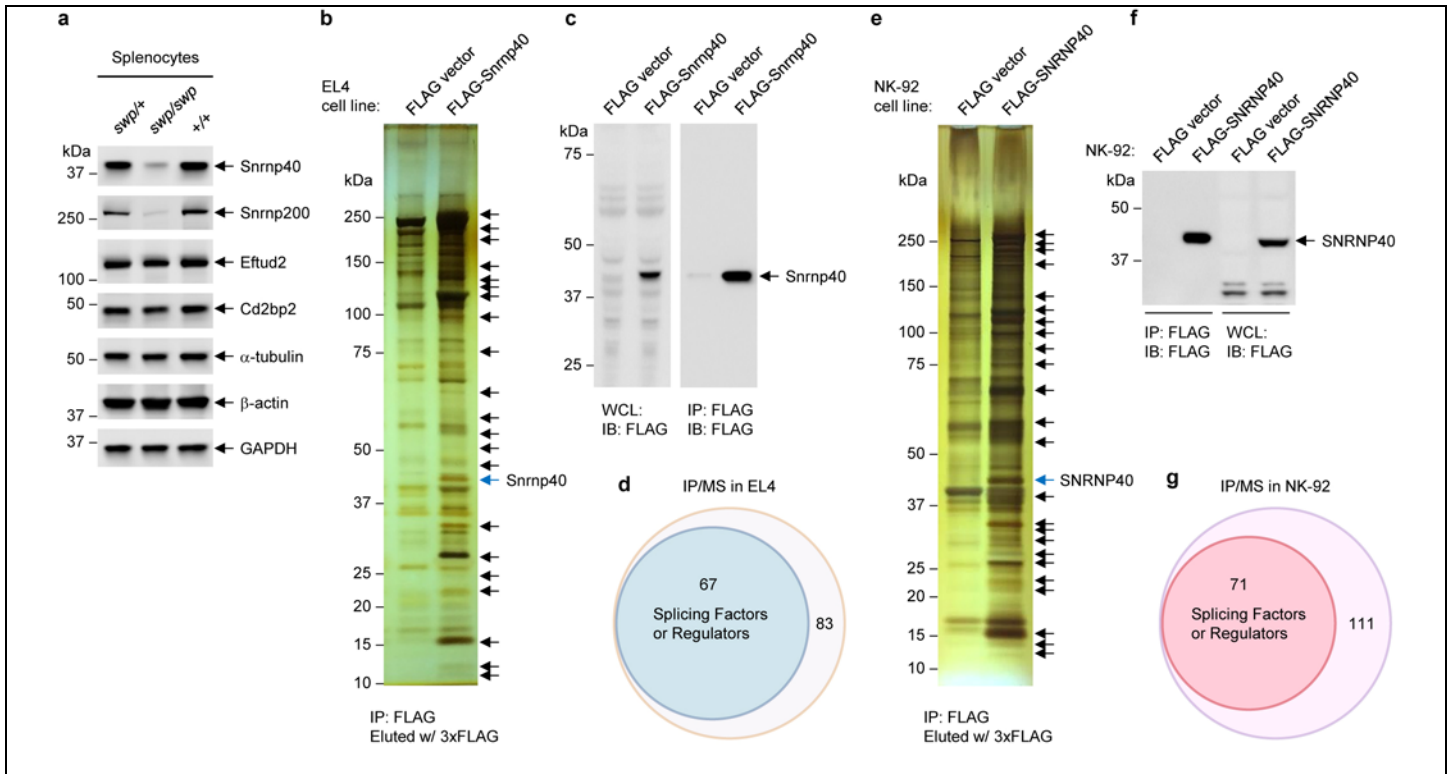

**Supplementary Figure 8**

**Coimmunoprecipitation of Snrnp40-interacting proteins for analysis by mass spectrometry.**

**a**, Immunoblot analysis of Snrnp40, Snrnp200, Eftud2, and Cd2bp2 in mouse splenocytes of the indicated genotypes. Experiment was repeated three times independently with similar results. **b-d**, Identification of Snrnp40-interacting proteins by mass spectrometry using mouse EL4 cells. **b**, Silver stained gel containing proteins immunoprecipitated from EL4 cells stably expressing FLAG-tagged mouse Snrnp40 (FLAG-Snrnp40) or vector alone. Arrows indicate bands present exclusively or with greater intensity in FLAG-Snrnp40 immunoprecipitate. **c**, Analysis of FLAG-Snrnp40 expression in EL4 cells by immunoblot of whole cell lysate or by immunoprecipitation and immunoblot. **d**, Venn diagram for top 83 proteins identified by mass spectrometry that coimmunoprecipitated with FLAG-Snrnp40 (top 25 candidates present only in Snrnp40 sample, and top 58 candidates with spectral index ratio > 7 in Snrnp40 vs. vector samples). 80.7% (67 proteins) were known splicing factors or regulators. **e-g**, Identification of SNRNP40-interacting proteins by mass spectrometry using human NK-92 cells. **e**, Silver stained gel containing proteins immunoprecipitated from NK-92 cells stably expressing FLAG-tagged human SNRNP40 (FLAG-SNRNP40) or vector alone. Arrows indicate bands present exclusively or with greater intensity in FLAG-SNRNP40 immunoprecipitate. **f**, Analysis of FLAG-SNRNP40 expression in NK-92 cells by immunoblot of whole cell lysate or by immunoprecipitation and immunoblot. **g**, Venn diagram for top 111 proteins identified by mass spectrometry that coimmunoprecipitated with FLAG-SNRNP40 (top 63 candidates present only in SNRNP40 sample, and top 48 candidates with spectral index ratio > 24 in SNRNP40 vs. vector samples). 64.0% (71 proteins) were known splicing factors or regulators. Experiment was performed one time (**b-g**).
