# Supplementary material
Source: PubMed Central journal article supplement (PMC7179765)

Supplementary Figure 9: uncropped images for gel and blots in Figure 1

Figure 1c

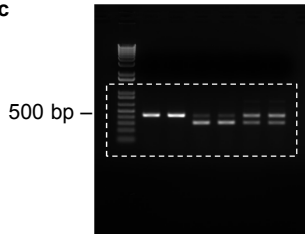

Figure 1d

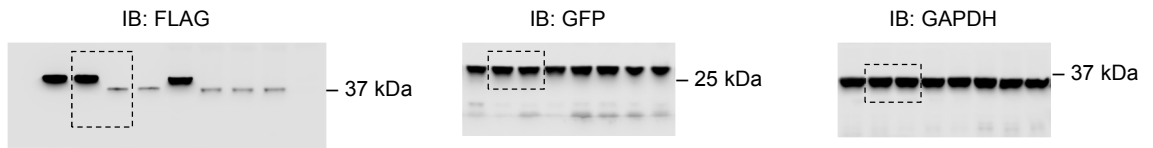

Figure 1e

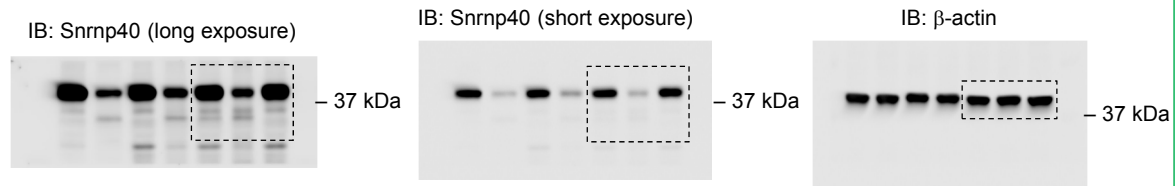

Supplementary Figure 10: uncropped images for gels and blots in Figure 6

Figure 6a

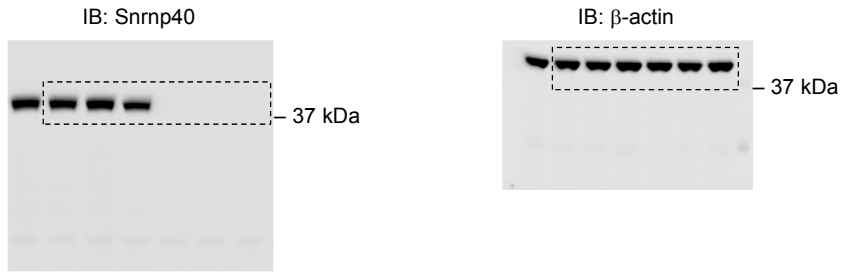

Figure 6d

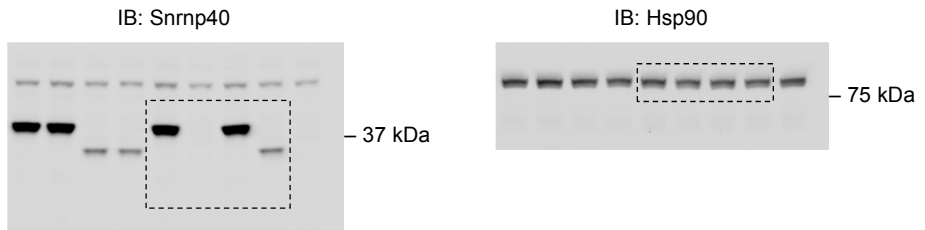

Figure 6e

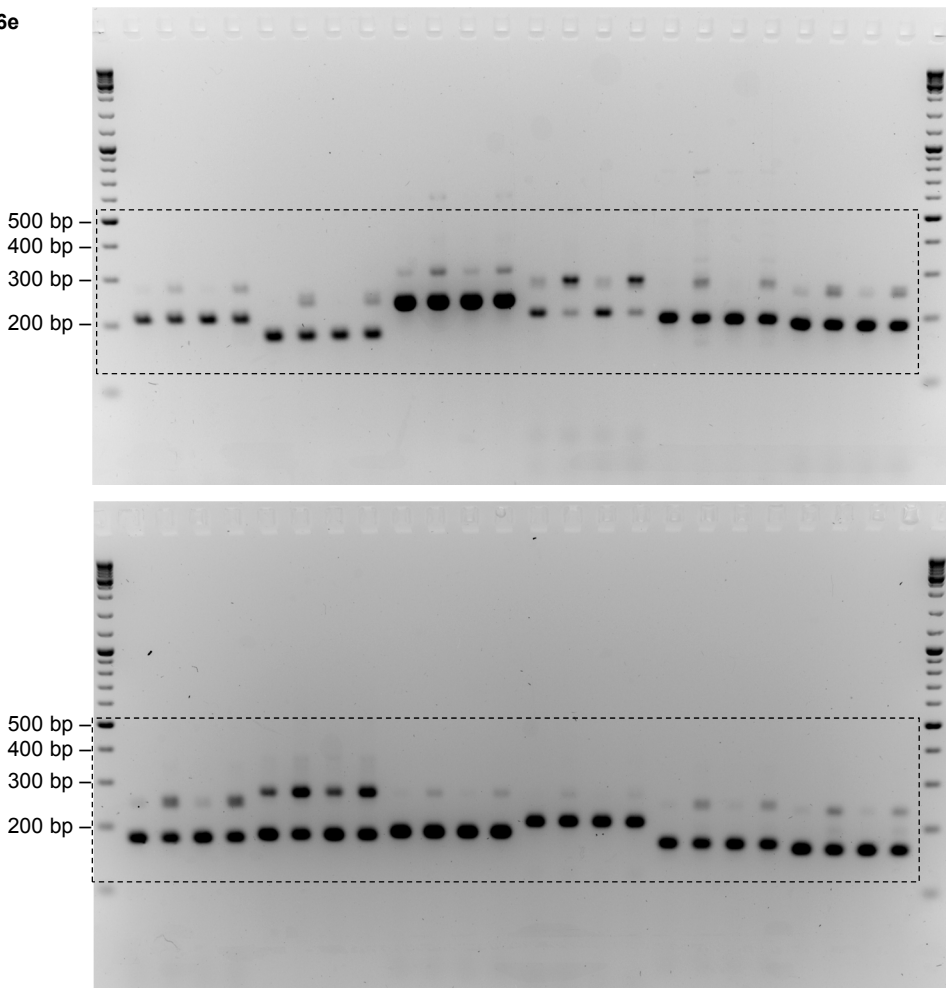

Supplementary Figure 11: uncropped images for gel and blots in Figure 7 and 8

Figure 7f

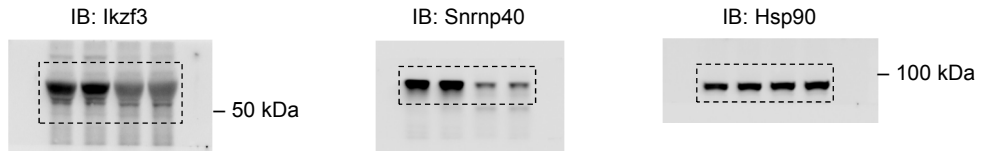

Figure 7g

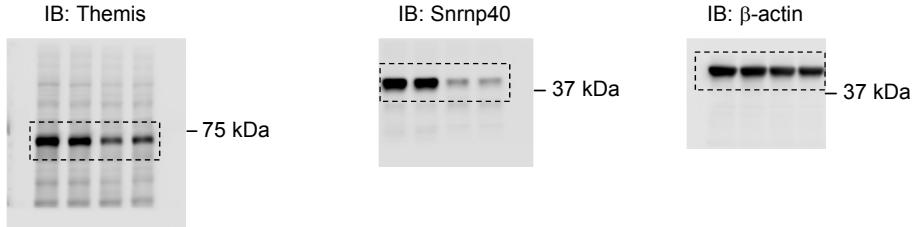

Figure 7i

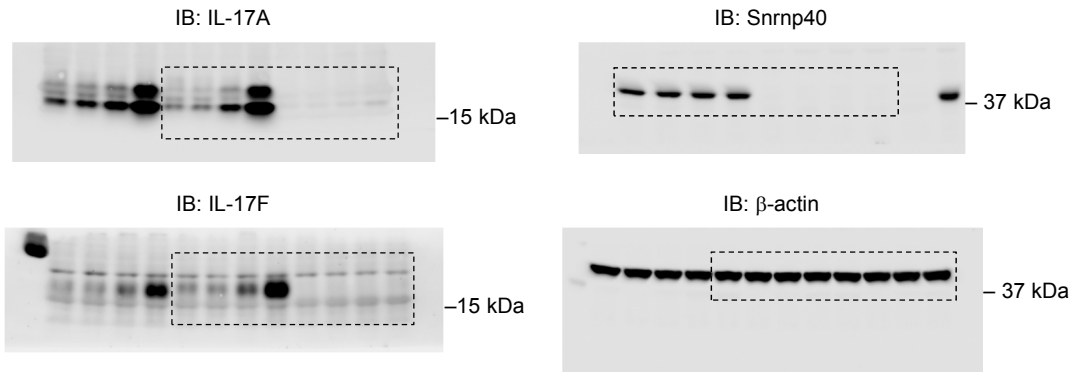

Figure 8c

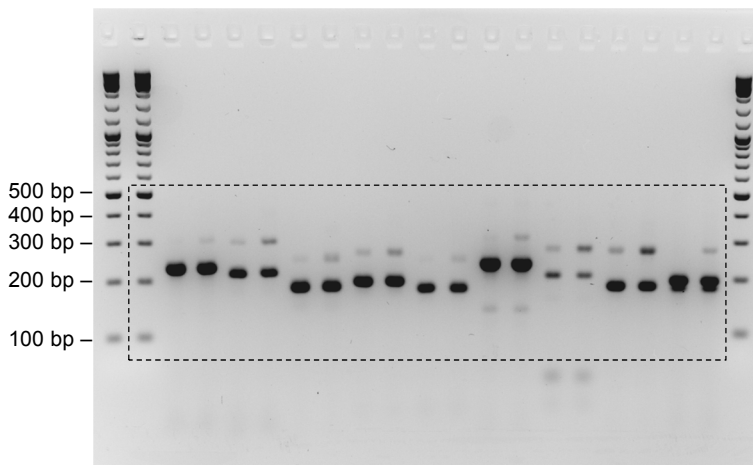

Supplement: NIHMS1580460-supplement-Supplementary_figures_9-11.pdf [file NIHMS1580460-supplement-Supplementary_figures_9-11.pdf]
