# Supplementary material
Source: PubMed Central journal article supplement (PMC7179765)
Supplement: NIHMS1580460-supplement-Supplementary_tables_1-5.pdf [file NIHMS1580460-supplement-Supplementary_tables_1-5.pdf]

**Supplementary Table 1. Offspring from crosses of *Snrnp40* mutant mice**

| Cross                                                                   | Offspring |        |           |          |                           |
|-------------------------------------------------------------------------|-----------|--------|-----------|----------|---------------------------|
|                                                                         | Genotype  | Number | Frequency |          | P value                   |
|                                                                         |           |        | Actual    | Expected |                           |
| <i>Snrnp40</i> <sup>+/-</sup> x<br><i>Snrnp40</i> <sup>+/-</sup>        | +/-       | 101    | 64.3%     | 50%      | 3.91 x 10 <sup>-12</sup>  |
|                                                                         | +/+       | 56     | 35.7%     | 25%      |                           |
|                                                                         | -/-       | 0      | 0%        | 25%      |                           |
| <i>Snrnp40</i> <sup>rplc/+</sup> x<br><i>Snrnp40</i> <sup>rplc/+</sup>  | rplc/+    | 50     | 64.9%     | 50%      | 2.94 X 10 <sup>-6</sup>   |
|                                                                         | +/+       | 27     | 35.1%     | 25%      |                           |
|                                                                         | rplc/rplc | 0      | 0%        | 25%      |                           |
| <i>Snrnp40</i> <sup>rplc/+</sup> x<br><i>Snrnp40</i> <sup>+/-</sup>     | rplc/+    | 22     | 34.4%     | 25%      | 6.93 x 10 <sup>-5</sup>   |
|                                                                         | +/-       | 19     | 29.7%     | 25%      |                           |
|                                                                         | +/+       | 23     | 35.9%     | 25%      |                           |
|                                                                         | rplc/-    | 0      | 0%        | 25%      |                           |
| <i>Snrnp40</i> <sup>swp/swp</sup> x<br><i>Snrnp40</i> <sup>+/-</sup>    | swp/+     | 72     | 100%      | 50%      | 2.15 X 10 <sup>-17</sup>  |
|                                                                         | swp/-     | 0      | 0%        | 50%      |                           |
| <i>Snrnp40</i> <sup>swp/swp</sup> x<br><i>Snrnp40</i> <sup>rplc/+</sup> | swp/+     | 1328   | 95.3%     | 50%      | 1.91 X 10 <sup>-250</sup> |
|                                                                         | swp/rplc  | 66     | 4.7%      | 50%      |                           |
| <i>Snrnp40</i> <sup>swp/+</sup> x<br><i>Snrnp40</i> <sup>swp/+</sup>    | swp/+     | 670    | 50.7%     | 50%      | 0.31                      |
|                                                                         | +/+       | 344    | 26.0%     | 25%      |                           |
|                                                                         | swp/swp   | 307    | 23.2%     | 25%      |                           |

A chi-square test with the appropriate degrees of freedom was used to calculate *P* values.

**Supplementary Table 2. Wild-type *Snrnp40* transcript expression level, viability, and phenotype of mice with *Snrnp40* allelic combinations**

| Genotype                  | % WT <i>Snrnp40</i> mRNA<br>(normalized to +/+)* | Viability** | Phenotype                                                               |
|---------------------------|--------------------------------------------------|-------------|-------------------------------------------------------------------------|
| +/+                       | 100%                                             | Viable      | Normal                                                                  |
| <i>swp</i> /+             | [55.1%]                                          | Viable      | Normal                                                                  |
| <i>rplc</i> /+            | [51.6%]                                          | Viable      | Normal                                                                  |
| +/-                       | 50%                                              | Viable      | Normal                                                                  |
| <i>swp</i> / <i>swp</i>   | 10.2%                                            | Viable      | Immunodeficiency,<br>reduced body size                                  |
| <i>swp</i> / <i>rplc</i>  | 6.7%                                             | Viable      | Immunodeficiency,<br>reduced body size,<br>white-spotted<br>ventral fur |
| <i>swp</i> /-             | [5.1%]                                           | Not viable  | –                                                                       |
| <i>rplc</i> / <i>rplc</i> | [3.2%]                                           | Not viable  | –                                                                       |
| <i>rplc</i> /-            | [1.6%]                                           | Not viable  | –                                                                       |
| -/-                       | 0%                                               | Not viable  | –                                                                       |

\*The quantity of wild-type (WT) *Snrnp40* mRNA in *Snrnp40*<sup>*swp/swp*</sup> and *Snrnp40*<sup>*swp/rplc*</sup> splenic T cells was measured by RT-qPCR and expressed relative to that measured in *Snrnp40*<sup>+/+</sup> splenic T cells. Percentages in brackets were calculated based on the percentages for *Snrnp40*<sup>*swp/swp*</sup> and *Snrnp40*<sup>*swp/rplc*</sup> mice. Percentages of 50% and 0% were assumed for *Snrnp40*<sup>+/-</sup> and *Snrnp40*<sup>-/-</sup> mice, respectively.

\*\*Genotypes were considered “viable” if any mice were born and survived to weaning age. Genotypes were considered “not viable” based on failure to observe any live mice at weaning age. Numbers and frequencies of offspring of each genotype are shown in Supplementary Table 1.

**Supplementary Table 3. Splicing errors in EL4 cells**

| <b>Splicing errors</b>               | <b><i>Snrnp40</i>-KO frequency*<br/>&gt; WT frequency*</b> | <b>WT frequency* &gt;<br/><i>Snrnp40</i>-KO frequency*</b> |
|--------------------------------------|------------------------------------------------------------|------------------------------------------------------------|
| <b>Intron retention</b>              | 214 (88.8%)                                                | 12 (30%)                                                   |
| <b>Exon skipping</b>                 | 5 (2.1%)                                                   | 18 (45%)                                                   |
| <b>Cryptic splice site<br/>usage</b> | 22 (9.1%)                                                  | 10 (25%)                                                   |
| <b>Total</b>                         | 241                                                        | 40                                                         |

\*The frequency of each type of splicing error (PIR or PSI) in mutant cells or wild-type (WT) cells was calculated by dividing the number of misspliced junctions by the total number of junctions detected in a given sample by RNA-seq. See Methods.

**Supplementary Table 4. Candidate genes for aspects of the *skywarp* immunological phenotypes**

| Gene                                       | Differential expression detected in cell type | Expression in mutant relative to wild-type cells* | RT-qPCR verification-cell types | Notes on encoded protein function and mouse mutant phenotypes                                                                                                                                                                                                                                                                                                                                                                                                |
|--------------------------------------------|-----------------------------------------------|---------------------------------------------------|---------------------------------|--------------------------------------------------------------------------------------------------------------------------------------------------------------------------------------------------------------------------------------------------------------------------------------------------------------------------------------------------------------------------------------------------------------------------------------------------------------|
| <b><i>Themis</i></b>                       | EL4 cells<br>HSPCs<br>T cells                 | 16.5%<br>55.4%<br>80.5%                           | Verified-splenocytes,<br>HSPCs  | Plays a central role in late thymocyte development by controlling both positive and negative T-cell selection. Required to sustain and/or integrate signals required for proper lineage commitment and maturation of T cells. [provided by Uniprot] Homozygous null mice have defects in T cell positive selection that leads to very few alpha-beta T cells being found in the periphery. [provided by MGI]                                                 |
| <b><i>Ikzf3</i></b>                        | EL4 cells<br>T cells                          | 49.3%<br>139.9%                                   | Verified-bone marrow cells      | Transcription factor that plays an important role in the regulation of lymphocyte differentiation. Plays an essential role in regulation of B-cell differentiation, proliferation and maturation to an effector state. Involved in regulating BCL2 expression and controlling apoptosis in T-cells in an IL2-dependent manner. Homozygous mutants exhibit greatly reduced B cell populations in the peritoneum, marginal zone and recirculating bone marrow. |
| <b><i>Il17a</i></b><br><b><i>Il17f</i></b> | EL4 cells<br>EL4 cells                        | 2.3%<br>23.2%                                     | Verified-EL4 cells              | An intact IL-17 pathway is necessary for development of functionally competent NK cells, and mice deficient in IL-17RA, IL-17A, or IL-17F displayed impaired NK cell-mediated cytokine responses and increased susceptibility to MCMV.                                                                                                                                                                                                                       |
| <b><i>Rag1</i></b>                         | HSPCs                                         | 24.9%                                             | Verified-HSPCs                  | Homozygotes for targeted null mutations exhibit arrested development of T and B cell maturation at the CD4-CD8- thymocyte or B220+/CD43+ pro-B cell stage due to inability to undergo V(D)J recombination. [provided by MGI]                                                                                                                                                                                                                                 |
| <b><i>Klf1</i></b>                         | HSPCs                                         | 34.2%                                             | Verified-HSPCs                  | Transcriptional activator. Homozygotes for an ENU-induced allele die as embryos; heterozygotes have reduced RBC, HCT, hemoglobin <sup>1</sup> . Homozygous null mice display defective erythropoiesis in fetal liver and die as embryos <sup>2</sup> .                                                                                                                                                                                                       |
| <b><i>Gfi1b</i></b>                        | HSPCs                                         | 41.7%                                             | Verified-HSPCs                  | Transcriptional repressor. Homozygous null mice are embryonic lethal. Conditional knockout in bone marrow in adult mice results in reduced hemoglobin and platelets and causes death within 3 weeks <sup>3, 4</sup> . Impaired embryonic erythropoiesis in <i>Gfi1b</i> <sup>-/-</sup> chimeric mice <sup>5</sup> .                                                                                                                                          |
| <b><i>Gata3</i></b>                        | HSPCs<br>T cells                              | 63.5%<br>132.4%                                   | Verified-HSPCs                  | Transcriptional activator which binds to the enhancer of the T-cell receptor alpha and delta genes. Binds to the consensus sequence 5'-AGATAG-3'. Required for the T-helper 2 (Th2) differentiation process following immune and inflammatory responses. [provided by Uniprot] Homozygous inactivation is embryonic lethal and show a variety of embryonic defects. [provided by MGI] Necessary for thymocyte development <sup>6-8</sup> , early             |

|              |                  |                |                |                                                                                                                                                                                                                                                                                                                                                                                                                                                         |
|--------------|------------------|----------------|----------------|---------------------------------------------------------------------------------------------------------------------------------------------------------------------------------------------------------------------------------------------------------------------------------------------------------------------------------------------------------------------------------------------------------------------------------------------------------|
|              |                  |                |                | lineage T progenitor development <sup>9</sup> .                                                                                                                                                                                                                                                                                                                                                                                                         |
| <b>Ets1</b>  | HSPCs            | 65.6%          | Verified-HSPCs | Transcription factor. May control the differentiation, survival and proliferation of lymphoid cells. [provided by Uniprot] Homozygotes for targeted null mutations exhibit reduced numbers of peripheral CD8+ T cells, impaired TCR-mediated activation of both CD4+ and CD8+ T cells, increased numbers of IgM-secreting plasma cells, and severely impaired NK cell development [provided by MGI] <sup>10-12</sup> .                                  |
| <b>Oas1a</b> | HSPCs<br>T cells | 46.2%<br>50.3% | Verified-HSPCs | Interferon-induced, dsRNA-activated antiviral enzyme which plays a critical role in cellular innate antiviral response. [provided by Uniprot] Antiviral function induced by IFN-beta in acute ocular HSV-1 infection <sup>13-15</sup> .                                                                                                                                                                                                                 |
| <b>Il18</b>  | HSPCs            | 38.6%          | Verified-HSPCs | A proinflammatory cytokine primarily involved in polarized T-helper 1 (Th1) cell and natural killer (NK) cell immune responses. Synergizes with IL12/interleukin-12 to induce IFNG synthesis from T-helper 1 (Th1) cells and natural killer (NK) cells. [provided by Uniprot] Mice homozygous for null alleles are deficient in producing IFN-gamma in response to infectious agents and have other impairments of the immune system. [provided by MGI] |
| <b>Irf7</b>  | HSPCs<br>T cells | 24.7%<br>58.0% | Verified-HSPCs | Key transcriptional regulator of type I interferon (IFN)-dependent immune responses and plays a critical role in the innate immune response against DNA and RNA viruses <sup>16</sup> . Homozygous null mice are more vulnerable to viral infection (influenza PR8M <sup>17</sup> , HSV-1 and EMCV <sup>18</sup> ) and exhibit decreased serum interferon levels in response to viral infection. [provided by MGI]                                      |
| <b>Ifit1</b> | HSPCs<br>T cells | 21.7%<br>33.3% | Verified-HSPCs | Interferon-induced antiviral RNA-binding protein that specifically binds single-stranded RNA bearing a 5'-triphosphate group (PPP-RNA), thereby acting as a sensor of viral single-stranded RNAs and inhibiting expression of viral messenger RNAs. [provided by Uniprot] Homozygous null mice display increased susceptibility to vesicular stomatitis virus infection. [provided by MGI]                                                              |

\*Based on RNA-seq data.

## References

1. White, R. A. *et al.* Hematologic characterization and chromosomal localization of the novel dominantly inherited mouse hemolytic anemia, neonatal anemia (Nan). *Blood Cells Mol. Dis.* **43**, 141-148 (2009).
2. Nuez, B., Michalovich, D., Bygrave, A., Ploemacher, R. & Grosveld, F. Defective haematopoiesis in fetal liver resulting from inactivation of the EKLf gene. *Nature* **375**, 316-318 (1995).
3. Foudi, A. *et al.* Distinct, strict requirements for Gfi-1b in adult bone marrow red cell and platelet generation. *J. Exp. Med.* **211**, 909-927 (2014).

4. Vassen, L. *et al.* Growth factor independence 1b (*gfi1b*) is important for the maturation of erythroid cells and the regulation of embryonic globin expression. *PLoS One* **9**, e96636 (2014).
5. Saleque, S., Cameron, S. & Orkin, S. H. The zinc-finger proto-oncogene *Gfi-1b* is essential for development of the erythroid and megakaryocytic lineages. *Genes Dev.* **16**, 301-306 (2002).
6. Ting, C. N., Olson, M. C., Barton, K. P. & Leiden, J. M. Transcription factor GATA-3 is required for development of the T-cell lineage. *Nature* **384**, 474-478 (1996).
7. Pai, S. Y. *et al.* Critical roles for transcription factor GATA-3 in thymocyte development. *Immunity* **19**, 863-875 (2003).
8. Wang, L. *et al.* Distinct functions for the transcription factors GATA-3 and ThPOK during intrathymic differentiation of CD4(+) T cells. *Nat. Immunol.* **9**, 1122-1130 (2008).
9. Hosoya, T. *et al.* GATA-3 is required for early T lineage progenitor development. *J. Exp. Med.* **206**, 2987-3000 (2009).
10. Barton, K. *et al.* The Ets-1 transcription factor is required for the development of natural killer cells in mice. *Immunity* **9**, 555-563 (1998).
11. Clements, J. L., John, S. A. & Garrett-Sinha, L. A. Impaired generation of CD8+ thymocytes in Ets-1-deficient mice. *J. Immunol.* **177**, 905-912 (2006).
12. Higuchi, T. *et al.* Thymomegaly, microsplenial, and defective homeostatic proliferation of peripheral lymphocytes in p51-Ets1 isoform-specific null mice. *Mol. Cell. Biol.* **27**, 3353-3366 (2007).
13. Austin, B. A., James, C., Silverman, R. H. & Carr, D. J. Critical role for the oligoadenylate synthetase/RNase L pathway in response to IFN-beta during acute ocular herpes simplex virus type 1 infection. *J. Immunol.* **175**, 1100-1106 (2005).
14. Elkhateeb, E. *et al.* The role of mouse 2',5'-oligoadenylate synthetase 1 paralogs. *Infect. Genet. Evol.* **45**, 393-401 (2016).
15. Pulit-Penalzoza, J. A., Scherbik, S. V. & Brinton, M. A. Activation of *Oas1a* gene expression by type I IFN requires both STAT1 and STAT2 while only STAT2 is required for *Oas1b* activation. *Virology* **425**, 71-81 (2012).
16. Ren, Y. *et al.* The Type I Interferon-IRF7 Axis Mediates Transcriptional Expression of *Usp25* Gene. *J. Biol. Chem.* **291**, 13206-13215 (2016).
17. Wilk, E. *et al.* RNAseq expression analysis of resistant and susceptible mice after influenza A virus infection identifies novel genes associated with virus replication and important for host resistance to infection. *BMC Genomics* **16**, 655-015-1867-8 (2015).
18. Honda, K. *et al.* IRF-7 is the master regulator of type-I interferon-dependent immune responses. *Nature* **434**, 772-777 (2005).

**Supplementary Table 5. RT-PCR primers used for the validation of intron retention and RT-qPCR primers used for the validation of differential expression of genes identified by RNA-seq**

| Target                 | Sequence (5' – 3')        | Target                | Sequence (5' – 3')       |
|------------------------|---------------------------|-----------------------|--------------------------|
| <i>Amdhd2</i> -e7-F    | TTCCACCACCGTGACCCAG       | <i>lsg15</i> (fwd)    | GCAGACTCCTTAATCCAGGG     |
| <i>Amdhd2</i> -e8-R    | AGTGTATGGCGGCCATTGC       | <i>lsg15</i> (rev)    | TGGAGTTAGTCACGGACACCAG   |
| <i>Trp53</i> -e8-F     | TTCTGGGACGGGACAGCTTT      | <i>Rsad2</i> (fwd)    | ACACAGCCAAGACATCCTTC     |
| <i>Trp53</i> -e9-R     | TGGTTTTTCTTTTGCAGGGG      | <i>Rsad2</i> (rev)    | CAAGTATTCACCCCTGTCCTG    |
| <i>Rpl10</i> -e6-F     | GCTCCAGACAGGGATGCGTG      | <i>lrf7</i> (fwd)     | TTGATCCGCATAAGGTGTACG    |
| <i>Rpl10</i> -e7-R     | CCGCTTCTCAGCAACCATGT      | <i>lrf7</i> (rev)     | TTCCCTATTTTCCGTGGCTG     |
| <i>Mapk8ip3</i> -e21-F | ATGTTCTAGACAGTGATGTGAACCC | <i>Oas1a</i> (fwd)    | AGAGATGCTTCCAAGGTGC      |
| <i>Mapk8ip3</i> -e22-R | TTCTGTGGATTGGGACGGGT      | <i>Oas1a</i> (rev)    | ACTGATCCTCAAAGCTGGTG     |
| <i>Ddx27</i> -e5-F     | GTGAGGATGAGGCAGGCTCC      | <i>Oas2</i> (fwd)     | GCCTGAATACTGAGTCACCTG    |
| <i>Ddx27</i> -e6-R     | GGAGAGGTTTCATGTCCTGGAAGG  | <i>Oas2</i> (rev)     | TTCAGTAAGTGGCTTGGAGTG    |
| <i>Ergic3</i> -e11-F   | AGGACTAACCAGTTCTCCGTGACCA | <i>Oas3</i> (fwd)     | TGCTACTGGTCAAACACTGG     |
| <i>Ergic3</i> -e12-R   | CTGTAAACATGCCCCCAATGAT    | <i>Oas3</i> (rev)     | CTGAACCTTTGCTCTCCACAG    |
| <i>Polrmt</i> -e19-F   | GACACATGCCGCTGACATCC      | <i>Oas11</i> (fwd)    | CTGTATCTACTGGACCAAGCAC   |
| <i>Polrmt</i> -e20-R   | TCCTGCAGCTTGGTGACCAG      | <i>Oas11</i> (rev)    | GCCACTATGTCCTCTGTAG      |
| <i>Rsb1l</i> -e7-F     | GCCTGATCAACCCGAGTAACC     | <i>Oas12</i> (fwd)    | ATCATTGTCCTTACCCACAGAG   |
| <i>Rsb1l</i> -e8-R     | GCTGAATCCTGGCATAGCGAA     | <i>Oas12</i> (rev)    | TGCTGGTTTTGAGTCTCTGG     |
| <i>Eif4a3</i> -e10-F   | CCGGGTGCTCATCTCCACA       | <i>Trem14</i> (fwd)   | TTCTCAGAAACATCAGCCTGG    |
| <i>Eif4a3</i> -e11-R   | CCCTGAGAATCCGGATGTCATC    | <i>Trem14</i> (rev)   | GATGGAAGAGTCAGTGGTCTC    |
| <i>Fkbp1a</i> -e1-F    | ACGAGAGGGACGAAGCCGA       | <i>Il18</i> (fwd)     | GCCTCAAACCTTCAAATCAC     |
| <i>Fkbp1a</i> -e2-R    | TAGTGCACCACGCAGGTCTGGC    | <i>Il18</i> (rev)     | GTTGTCTGATTCCAGGTCTCC    |
| <i>Sec61a1</i> -e3-F   | ATTCTGTGCATCTTGCCGGAA     | <i>Klf1</i> (fwd)     | CCTCCATCAGTACACTCACC     |
| <i>Sec61a1</i> -e4-R   | TCACTCGCATCCAGTAGAACGG    | <i>Klf1</i> (rev)     | CCTCCGATTCAGACTCAGG      |
| <i>Ssb</i> -e5-F       | AAAGGTTTCCCAACTGACGCC     | <i>Gfi1b</i> (fwd)    | CTTTGCTGTGATGTCTGTG      |
| <i>Ssb</i> -e6-R       | TCTCCACAAACTTCTTGCAGACTG  | <i>Gfi1b</i> (rev)    | GGGTGGATGAACGCTTGAAG     |
| <i>Eif5a</i> -e6-F     | ATCACAGTGCTGTCTGCCATG     | <i>Gata1</i> (fwd)    | CCAATGCACTAACTGTCAAAC    |
| <i>Eif5a</i> -e7-R     | AGGGTCTCCCCGACAGTTTG      | <i>Gata1</i> (rev)    | ATCTTTCCTCATGGTCAAGTG    |
| <i>Ubap2</i> -e28-F    | CTGCAGCGGCCCCGGCTAC       | <i>Gata3</i> (fwd)    | CAACCTCTACCCACTGTG       |
| <i>Ubap2</i> -e29-R    | TCAGGGTCTAGTTTGCCAG       | <i>Gata3</i> (rev)    | GATGTCCCTGCTCTCCTTG      |
| <i>Cope</i> -e8-F      | CCCTGAGACCCTCATCAATC      | <i>Ets1</i> (fwd)     | AGTCTTGTGAGTCTTTATCAGC   |
| <i>Cope</i> -e10-R     | AAGCACTGGGCGCATACTGC      | <i>Ets1</i> (rev)     | TTTTCTCTTTCCCATCTCC      |
| <i>Slc25a11</i> -e5-F  | GGCTGCATCCCTACCATGGC      | <i>Stat1</i> (fwd)    | GCCGAGAACATACCAGAGAATC   |
| <i>Slc25a11</i> -e6-R  | CTAGTTTTGACGATGTCCAC      | <i>Stat1</i> (rev)    | GATGTATCCAGTTCGCTTAGGG   |
| <i>Cd8a</i> (fwd)      | CATCACTCTCATCTGCTACCAC    | <i>Xrcc5</i> (fwd)    | TGACTGCTCAGGACGTTTTTC    |
| <i>Cd8a</i> (rev)      | TTTTCTCTGAAGGTCTGGGC      | <i>Xrcc5</i> (rev)    | CCTTGGTGATGTTCCCTTCTG    |
| <i>Cd8b1</i> (fwd)     | TGGCCGTCTACTTTTACTGTG     | <i>Themis</i> (fwd)   | GAACAATAAATCTGCCAAAGTCTC |
| <i>Cd8b1</i> (rev)     | GGCGCTGATCATTGTGAAAC      | <i>Themis</i> (rev)   | CTCTCCACATCAGCCACATC     |
| <i>Rag1</i> (fwd)      | TTTGGGCATTGAGGACTCTC      | <i>Nt5e</i> (fwd)     | GCTTCAGGGAATGCAACATG     |
| <i>Rag1</i> (rev)      | CAATGTGCTAGGTGCTAGGAG     | <i>Nt5e</i> (rev)     | TGCCACCTCCGTTTACAATG     |
| <i>Icos</i> (fwd)      | AGAAATACGGATCCAGTGTC      | <i>Arg1</i> (fwd)     | AAGAATGGAAGAGTCAGTGTGG   |
| <i>Icos</i> (rev)      | CTAGTCCATGCGTTTCTCTG      | <i>Arg1</i> (rev)     | GGGAGTGTTGATGTCAGTGTG    |
| <i>Hemgn</i> (fwd)     | ACATCACAATGGCTCCTTGG      | <i>Slamf6</i> (fwd)   | GGCAGACACAGGATCATAAC     |
| <i>Hemgn</i> (rev)     | CCCTTCCCTTCTGTTTGTG       | <i>Slamf6</i> (rev)   | AGGTCCCTTCTCTAGCAGG      |
| <i>Il6</i> (fwd)       | CAAAGCCAGAGTCTTCAGAG      | <i>Tnfrsf10</i> (fwd) | TCTGTGGCTGTGACTTACATG    |
| <i>Il6</i> (rev)       | GTCCTTAGCCACTCCTTCTG      | <i>Tnfrsf10</i> (rev) | AAGCAGGGTCTGTCAAGATC     |
| <i>Cd83</i> (fwd)      | CTTTCAGGAAGTACAGGGCAG     | <i>Cd226</i> (fwd)    | AACCCACTTATCTGCAAGGAG    |
| <i>Cd83</i> (rev)      | GAAAAGCTTGTCCGTACCAG      | <i>Cd226</i> (rev)    | TGTCCACAATGTCTCTTTCAC    |
| <i>Ifit1</i> (fwd)     | AGAGTCAAGGCAGGTTTCTG      | <i>Ikzf3</i> (fwd)    | GTCATATTAACACTGCACACGGG  |
| <i>Ifit1</i> (rev)     | TGTGAAGTGACATCTCAGCTG     | <i>Ikzf3</i> (rev)    | AGAACTCACACTTGTACGGC     |
| <i>Ifit3</i> (fwd)     | AGCACAGAAACAGATCACCAT     |                       |                          |
| <i>Ifit3</i> (rev)     | CACCCTGTCTTCCATATGACTG    |                       |                          |
